# Supplementary material for: Construction of diagnostic markers for hub lncRNAs in Parkinson’s disease based on chip re-annotation
Source: Research Square preprint supplement (doi:10.21203/rs.3.rs-435070/v1), 2021-04-28
Supplement: Supplementary file 1 [file 87013ad90ffa5b81dce17c14.xlsx]

## Sheet: tan_kegg
ID	Description	GeneRatio	BgRatio	pvalue	p.adjust	qvalue	geneID	Count
hsa05034	Alcoholism	44340	180/7493	0.000221903	0.0168646	0.0165843	HDAC1/HIST2H2BE/HIST1H2BK/HIST1H2AC/SHC4	5
hsa05322	Systemic lupus erythematosus	44279	133/7493	0.00842493	0.246619	0.24252	HIST2H2BE/HIST1H2BK/HIST1H2AC	3
hsa04340	Hedgehog signaling pathway	44251	47/7493	0.00973497	0.246619	0.24252	LRP2/SMURF2	2
hsa05220	Chronic myeloid leukemia	44251	76/7493	0.02426	0.386432	0.380009	HDAC1/SHC4	2
hsa05203	Viral carcinogenesis	44279	201/7493	0.0254231	0.386432	0.380009	HDAC1/HIST2H2BE/HIST1H2BK	3

## Sheet: turquoise_kegg
ID	Description	GeneRatio	BgRatio	pvalue	p.adjust	qvalue	geneID	Count
hsa00190	Oxidative phosphorylation	38/865	133/7493	5.82507e-08	1.75335e-05	1.54518e-05	ATP6V1B2/COX7A2L/ATP5B/COX7A2/NDUFAB1/ATP5J/NDUFV2/NDUFB3/NDUFB5/ATP6AP1/ATP6V1E1/UQCRFS1/ATP6V0D1/ATP6V1G2/NDUFA4/PPA1/NDUFA8/NDUFA12/SDHC/ATP6V1A/ATP6V1D/ATP5C1/ATP5A1/ATP6V1G1/ATP6V1C1/ATP6V0A1/ATP5G3/ATP5F1/UQCRC2/ATP5L/UQCRB/COX7B/COX5A/COX11/NDUFB6/NDUFB4/NDUFA6/NDUFS1	38
hsa04120	Ubiquitin mediated proteolysis	34/865	137/7493	9.4988e-06	0.00142957	0.00125984	UBE4A/UBE2S/DDB1/UBE2E3/HERC2/RBX1/UBE2Q2/UBE2E2/FBXW7/UBE2D2/SOCS3/UBE2J1/UBE2QL1/NEDD4L/RCHY1/CDC27/CDC16/UBE3A/UBE2F/UBE2B/UBE2A/UBE2N/UBE2K/ANAPC10/ANAPC7/XIAP/WWP1/SKP1/TRIM37/TRIM32/RFWD2/CUL4A/RNF7/CUL2	34
hsa04932	Non-alcoholic fatty liver disease (NAFLD)	35/865	149/7493	2.53772e-05	0.00254618	0.00224388	LEPR/COX7A2L/COX7A2/PRKAG1/NDUFAB1/NDUFV2/NDUFB3/NDUFB5/LEP/UQCRFS1/NDUFA4/NDUFA8/NDUFA12/PRKAG2/PRKAA1/RAC1/SDHC/SOCS3/PIK3CB/PIK3R3/CYCS/CDC42/IL6R/MAPK9/MAPK8/UQCRC2/MAPK10/UQCRB/COX7B/COX5A/MLX/NDUFB6/NDUFB4/NDUFA6/NDUFS1	35
hsa05012	Parkinson disease	33/865	142/7493	5.40101e-05	0.00397134	0.00349984	PARK7/SLC25A5/COX7A2L/ATP5B/COX7A2/NDUFAB1/ATP5J/NDUFV2/NDUFB3/NDUFB5/UQCRFS1/VDAC2/NDUFA4/NDUFA8/NDUFA12/SDHC/UBE2J1/CYCS/VDAC3/ATP5C1/ATP5A1/ATP5G3/ATP5F1/UQCRC2/UCHL1/UQCRB/COX7B/COX5A/GNAL/NDUFB6/NDUFB4/NDUFA6/NDUFS1	33
hsa05016	Huntington disease	41/865	193/7493	6.59692e-05	0.00397134	0.00349984	AP2M1/SOD1/SLC25A5/COX7A2L/ATP5B/COX7A2/NDUFAB1/ATP5J/NDUFV2/NDUFB3/NDUFB5/TBPL1/UQCRFS1/VDAC2/NDUFA4/NDUFA8/NDUFA12/SDHC/IFT57/BDNF/CYCS/VDAC3/ATP5C1/ATP5A1/HIP1/ATP5G3/ATP5F1/UQCRC2/AP2B1/UQCRB/COX7B/COX5A/PLCB4/POLR2B/POLR2C/POLR2K/NDUFB6/NDUFB4/NDUFA6/NDUFS1/DCTN4	41
hsa03050	Proteasome	15/865	45/7493	9.27272e-05	0.00465181	0.00409952	PSMC4/PSMC6/PSMD7/PSMA4/PSMD14/POMP/PSMD12/PSMD11/PSMD1/PSME3/PSMA5/PSMA1/PSMA7/PSMB4/PSMB1	15
hsa00620	Pyruvate metabolism	13/865	39/7493	0.000270759	0.0116426	0.0102603	LDHA/GLO1/MDH1/ACYP1/ACAT2/DLD/FH/MDH2/DLAT/LDHB/PDHB/ME1/ME2	13
hsa04721	Synaptic vesicle cycle	20/865	78/7493	0.000404841	0.0128992	0.0113677	AP2M1/ATP6V1B2/STXBP1/ATP6V1E1/ATP6V0D1/ATP6V1G2/SLC17A6/CPLX1/SLC32A1/ATP6V1A/ATP6V1D/ATP6V1G1/ATP6V1C1/SYT1/ATP6V0A1/AP2B1/RIMS1/SNAP25/NAPA/SLC1A1	20
hsa00900	Terpenoid backbone biosynthesis	9/865	22/7493	0.000429478	0.0128992	0.0113677	FDPS/ZMPSTE24/ACAT2/PCYOX1/HMGCR/ICMT/HMGCS1/IDI1/NUS1	9
hsa05010	Alzheimer disease	35/865	171/7493	0.000466714	0.0128992	0.0113677	COX7A2L/ATP5B/COX7A2/NDUFAB1/ATP5J/NDUFV2/NDUFB3/NDUFB5/CDK5/UQCRFS1/NDUFA4/NDUFA8/NDUFA12/SDHC/GRIN2A/RTN3/RTN4/CYCS/ATP5C1/ATP5A1/ATP5G3/ATP5F1/UQCRC2/UQCRB/COX7B/PPP3CA/PPP3CB/COX5A/PLCB4/CDK5R1/NDUFB6/NDUFB4/NDUFA6/NDUFS1/PPP3R1	35
hsa04714	Thermogenesis	44/865	231/7493	0.000490435	0.0128992	0.0113677	COX7A2L/ATP5B/COX7A2/PRKAG1/NDUFAB1/ATP5J/NDUFV2/NDUFB3/NDUFB5/NDUFAF1/UQCRFS1/TSC1/NDUFA4/NDUFA8/COX16/NDUFA12/COA6/NDUFAF2/PRKAG2/PRKAA1/SDHC/RPS6KA6/ATF2/ATP5C1/ATP5A1/ATP5G3/ATP5F1/UQCRC2/ATP5L/UQCRB/NDUFAF7/NDUFAF4/NDUFAF5/COX7B/COX5A/COX11/ACSL6/ACSL3/NRAS/GNAS/NDUFB6/NDUFB4/NDUFA6/NDUFS1	44
hsa05120	Epithelial cell signaling in Helicobacter pylori infection	18/865	68/7493	0.000514255	0.0128992	0.0113677	ATP6V1B2/CXCL1/ATP6AP1/ATP6V1E1/ATP6V0D1/ATP6V1G2/RAC1/MAP2K4/ATP6V1A/ATP6V1D/CDC42/ATP6V1G1/ATP6V1C1/ATP6V0A1/MAPK9/MAPK8/PAK1/MAPK10	18
hsa03420	Nucleotide excision repair	14/865	47/7493	0.000589214	0.013632	0.0120135	RFC4/CCNH/XPA/DDB1/CETN2/RPA3/CDK7/RBX1/RPA4/RAD23B/GTF2H1/POLE4/CUL4A/RPA1	14
hsa03060	Protein export	9/865	23/7493	0.000634044	0.013632	0.0120135	SEC61G/SRP19/OXA1L/SPCS1/SPCS2/SEC11C/SRP72/SEC61A2/SEC63	9
hsa00020	Citrate cycle (TCA cycle)	10/865	30/7493	0.00137335	0.0275585	0.0242865	MDH1/CS/SDHC/DLD/FH/MDH2/DLAT/ACLY/PDHB/IDH3A	10
hsa04966	Collecting duct acid secretion	9/865	27/7493	0.00237501	0.04468	0.0393752	ATP6V1B2/ATP6V1E1/ATP6V0D1/ATP6V1G2/ATP6V1A/ATP6V1D/ATP6V1G1/ATP6V1C1/ATP6V0A1	9
hsa04723	Retrograde endocannabinoid signaling	29/865	148/7493	0.00277252	0.0471548	0.0415563	NDUFAB1/NDUFV2/NDUFB3/NDUFB5/GABRR1/NDUFA4/NDUFA8/SLC17A6/GNG3/NDUFA12/SLC32A1/MAPK9/MAPK8/MAPK10/GRIA1/GRIA2/RIMS1/PLCB4/GNAO1/GNB1/GNB5/GABRG2/GABRB3/GABRB2/GABRA1/NDUFB6/NDUFB4/NDUFA6/NDUFS1	29
hsa04260	Cardiac muscle contraction	18/865	78/7493	0.00281989	0.0471548	0.0415563	COX7A2L/COX7A2/SLC9A6/CACNA2D2/CACNG3/UQCRFS1/CACNA2D3/ATP1A1/SLC8A1/UQCRC2/SLC9A1/CACNA2D1/UQCRB/COX7B/COX5A/TPM3/ATP1B1/CACNB4	18
hsa05110	Vibrio cholerae infection	13/865	50/7493	0.0035489	0.0562221	0.049547	ATP6V1B2/SEC61G/ATP6AP1/ATP6V1E1/ATP6V0D1/ATP6V1G2/ATP6V1A/ATP6V1D/ATP6V1G1/ATP6V1C1/ATP6V0A1/SEC61A2/GNAS	13
hsa05014	Amyotrophic lateral sclerosis (ALS)	13/865	51/7493	0.00427181	0.0642907	0.0566577	SOD1/TOMM40L/NEFL/NEFM/NEFH/RAC1/GRIN2A/CYCS/GRIA1/GRIA2/PPP3CA/PPP3CB/PPP3R1	13
hsa00230	Purine metabolism	25/865	130/7493	0.00673146	0.0960039	0.0846056	NME1/IMPDH2/PGM1/AK6/PFAS/GMPR2/NT5C3B/RRM1/PAPSS2/NTPCR/PDE1A/DGUOK/PDE8B/PDE4D/PRPS1/PPAT/ADSL/NME7/GMPS/GUCY1B3/GUCY1A3/PAICS/HPRT1/ADK/AK9	25
hsa00280	Valine, leucine and isoleucine degradation	12/865	48/7493	0.00701689	0.0960039	0.0846056	ACADM/OXCT1/AUH/ACAT2/AACS/ACAD8/BCAT1/DLD/ABAT/ACADSB/HMGCLL1/HMGCS1	12
hsa03018	RNA degradation	17/865	79/7493	0.00769485	0.100702	0.0887461	C1D/ENO2/PAPD7/LSM1/PARN/LSM6/PFKM/DIS3L/DHX36/LSM5/CNOT7/HSPA9/EXOSC6/TOB2/TTC37/WDR61/PFKP	17
hsa04070	Phosphatidylinositol signaling system	20/865	99/7493	0.00841465	0.103749	0.0914309	CDIPT/INPP1/SACM1L/IMPA1/PPIP5K2/DGKI/TMEM55B/SYNJ1/PIK3CB/PIK3R3/IP6K2/MTMR1/MTMR4/MTMR6/PLCB4/OCRL/IMPAD1/INPP4A/CDS1/CDS2	20
hsa04150	mTOR signaling pathway	28/865	153/7493	0.008617	0.103749	0.0914309	ATP6V1B2/RRAGA/MAP2K1/DEPDC5/RRAGB/SEC13/ATP6V1E1/TSC1/ATP6V1G2/PRKAA1/RPS6KA6/CAB39L/PIK3CB/PIK3R3/TBC1D7/RRAGC/ATP6V1A/ATP6V1D/EIF4E/ATP6V1G1/ATP6V1C1/SEH1L/FZD3/LAMTOR3/LAMTOR5/NRAS/CAB39/BRAF	28
hsa03022	Basal transcription factors	11/865	45/7493	0.0114895	0.133013	0.117221	TAF7/GTF2E2/CCNH/GTF2B/TBPL1/CDK7/TAF15/TAF13/TAF9B/GTF2H1/GTF2F1	11
hsa04146	Peroxisome	17/865	83/7493	0.0126378	0.133814	0.117927	SOD1/PEX11B/PHYH/MPV17/PRDX1/EPHX2/NUDT19/PEX19/FAR2/HMGCLL1/AGPS/PEX1/PEX7/PEX3/ACSL6/ACSL3/ABCD3	17
hsa03013	RNA transport	29/865	165/7493	0.0131921	0.133814	0.117927	EIF2B1/EIF2B2/RPP38/NUP155/SNUPN/SEC13/EIF3I/RPP40/NUP85/THOC7/EIF2B3/NUP93/EIF4G3/PRMT5/EIF1AX/EIF4E/RPP14/SEH1L/EIF2S3/NCBP2/ALYREF/SUMO1/SUMO3/RBM8A/SENP2/XPOT/EIF5/RAN/CYFIP2	29
hsa04141	Protein processing in endoplasmic reticulum	29/865	165/7493	0.0131921	0.133814	0.117927	STT3A/SEC61G/SEC13/RBX1/STT3B/PLAA/SVIP/UBE2D2/RAD23B/UBE2J1/HSPA6/DNAJC10/MAPK9/MAPK8/DDOST/SEC23A/SEC31A/MAPK10/HSPA4L/SKP1/PDIA3/SAR1A/UBQLN1/DNAJA2/SEC61A2/SEC63/ERLEC1/SSR1/SSR3	29
hsa05033	Nicotine addiction	10/865	40/7493	0.0133369	0.133814	0.117927	GABRR1/SLC17A6/SLC32A1/GRIN2A/GRIA1/GRIA2/GABRG2/GABRB3/GABRB2/GABRA1	10
hsa04137	Mitophagy - animal	14/865	65/7493	0.0146964	0.140346	0.123683	CSNK2B/GABARAPL2/TBK1/FUNDC1/MFN1/CITED2/MAPK9/MAPK8/MAPK10/OPTN/BNIP3/RHOT1/NRAS/BECN1	14
hsa04360	Axon guidance	31/865	181/7493	0.0151997	0.140346	0.123683	CDK5/SEMA3E/MYL12B/LRRC4/L1CAM/BOC/RAC1/SLIT2/PIK3CB/EPHB1/EPHA5/EPHA4/EPHA7/PIK3R3/CDC42/SRGAP2/EFNA5/RASA1/LRRC4C/PAK1/PAK6/PAK3/SEMA6D/SEMA3C/PPP3CA/PPP3CB/FZD3/NRAS/TRPC1/PPP3R1/CAMK2D	31
hsa00250	Alanine, aspartate and glutamate metabolism	9/865	35/7493	0.0153868	0.140346	0.123683	GOT2/ASS1/NIT2/GFPT1/ABAT/ASNS/PPAT/ADSL/RIMKLA	9
hsa00270	Cysteine and methionine metabolism	11/865	47/7493	0.0159274	0.141004	0.124263	LDHA/GOT2/MDH1/SMS/BHMT/BCAT1/MDH2/GCLM/LDHB/AHCYL2/CDO1	11
hsa05210	Colorectal cancer	17/865	86/7493	0.0177653	0.152782	0.134642	MLH1/MAP2K1/MSH2/TCF7L1/RAC1/RALB/PIK3CB/PIK3R3/CYCS/MAPK9/MAPK8/MAPK10/NRAS/RALGDS/BRAF/APC/CTNNB1	17
hsa00072	Synthesis and degradation of ketone bodies	4/865	10/7493	0.0209108	0.170779	0.150503	OXCT1/ACAT2/HMGCLL1/HMGCS1	4
hsa04144	Endocytosis	39/865	244/7493	0.0209928	0.170779	0.150503	AP2M1/ARPC1A/TSG101/STAM/AMPH/SH3GL2/SMAP1/VPS4B/ZFYVE27/SMAP2/VPS35/ZFYVE9/ARF3/RAB11FIP2/RAB11FIP4/NEDD4L/LDLRAP1/PDCD6IP/HSPA6/CDC42/ARFGEF1/ARFGEF2/RAB11A/CAPZA2/AP2B1/VTA1/WWP1/PSD3/DNAJC6/RABEP1/CAPZB/SNX4/ARPC2/EPS15/CHMP1B/CHMP4B/CHMP2B/AGAP1/IQSEC1	39
hsa01200	Carbon metabolism	21/865	116/7493	0.0235376	0.186443	0.164307	GOT2/PGAM1/MDH1/ENO2/ACADM/CS/ACAT2/PFKM/SDHC/DLD/FH/MDH2/DLAT/PRPS1/PDHB/ME1/ME2/PFKP/PGK1/IDH3A/RPE	21
hsa04216	Ferroptosis	9/865	40/7493	0.03538	0.267124	0.235409	PCBP1/VDAC2/CP/GCLM/VDAC3/PRNP/ACSL6/ACSL3/MAP1LC3B	9
hsa04140	Autophagy - animal	22/865	128/7493	0.0354982	0.267124	0.235409	RRAGA/CTSL/IGBP1/MAP2K1/ATG14/RRAGB/GABARAPL2/TSC1/PRKAA1/PIK3CB/PIK3R3/RRAGC/MAPK9/MAPK8/MAPK10/BNIP3/PPP2CA/MTMR4/NRAS/BECN1/NRBF2/DAPK1	22
hsa04961	Endocrine and other factor-regulated calcium reabsorption	10/865	47/7493	0.0389976	0.279501	0.246317	AP2M1/ATP1A1/SLC8A1/RAB11A/AP2B1/CALB1/ATP1B1/ATP2B1/PLCB4/GNAS	10
hsa04730	Long-term depression	12/865	60/7493	0.0390002	0.279501	0.246317	MAP2K1/GNAZ/GRIA1/GRIA2/PPP2CA/PLCB4/NRAS/GNAO1/GNAS/GUCY1B3/GUCY1A3/BRAF	12
hsa00562	Inositol phosphate metabolism	14/865	74/7493	0.0416166	0.286989	0.252916	CDIPT/INPP1/SACM1L/IMPA1/FIG4/SYNJ1/PIK3CB/MTMR1/MTMR4/MTMR6/PLCB4/OCRL/IMPAD1/INPP4A	14
hsa03430	Mismatch repair	6/865	23/7493	0.0419519	0.286989	0.252916	MLH1/RFC4/MSH2/RPA3/RPA4/RPA1	6
hsa00520	Amino sugar and nucleotide sugar metabolism	10/865	48/7493	0.0443715	0.288238	0.254017	HEXB/PGM1/GNPDA1/UAP1/NAGK/GNPNAT1/GNPDA2/GFPT1/CMAS/UXS1	10
hsa00010	Glycolysis / Gluconeogenesis	13/865	68/7493	0.045047	0.288238	0.254017	LDHA/PGAM1/ENO2/AKR1A1/PGM1/BPGM/PFKM/DLD/DLAT/LDHB/PDHB/PFKP/PGK1	13
hsa04110	Cell cycle	21/865	124/7493	0.0451439	0.288238	0.254017	CCNH/CCNA1/ORC3/CHEK2/CDK7/RBX1/YWHAG/PRKDC/BUB3/MAD2L1/YWHAB/YWHAH/YWHAZ/CDC27/CDC16/ANAPC10/ANAPC7/SKP1/ORC5/ORC4/ATR	21
hsa01230	Biosynthesis of amino acids	14/865	75/7493	0.0459649	0.288238	0.254017	GOT2/PGAM1/ENO2/ASS1/CS/PFKM/BCAT1/ARG2/ASNS/PRPS1/PFKP/PGK1/IDH3A/RPE	14
hsa05211	Renal cell carcinoma	13/865	69/7493	0.0498942	0.306493	0.270104	MAP2K1/RBX1/RAC1/FH/PIK3CB/PIK3R3/CDC42/PAK1/PAK6/PAK3/NRAS/BRAF/CUL2	13

## Sheet: midnightblue_kegg
ID	Description	GeneRatio	BgRatio	pvalue	p.adjust	qvalue	geneID	Count
hsa03440	Homologous recombination	44201	41/7493	0.0270682	0.117642	0.103195	XRCC2	1
hsa04137	Mitophagy - animal	44201	65/7493	0.042639	0.117642	0.103195	RAB7A	1

## Sheet: AUC.reslut
ID	best_gm	best_cost	accurary	sensitivity	specificity	AUC
LOC147727	1000	1	0.943662	1	0.84	0.6117
LOC158696	1	1	0.732394	0.913043	0.4	0.5052
RP11.342C20.3	1000	2	0.647887	1	0	0.6061
AC058791.1	1	1	0.704225	0.891304	0.36	0.5557
C15orf37	10	2	0.760563	0.956522	0.4	0.5443
LOC286367	1	2	0.647887	1	0	0.5296
NCRNA00261	1	4	0.690141	0.934783	0.24	0.4339
LOC90784	0.1	1	0.788732	0.869565	0.64	0.5104
FLJ39653	0.1	4	0.746479	0.869565	0.52	0.5391
NCRNA00086	1	1	0.802817	0.934783	0.56	0.4687
CTD.2230D16.1	1	2	0.704225	0.956522	0.24	0.5835
RP4.751H13.6	1000	2	0.929577	0.978261	0.84	0.6583
RP11.807H7.1	1	2	0.647887	1	0	0.4904
CTD.2339L15.1	1	2	0.676056	0.978261	0.12	0.553
LOC145474	10	1	0.802817	0.913043	0.6	0.5983
XXbac.BPG181B23.4	1e-05	1	0.647887	1	0	0.5417
AC068491.1	1	4	0.732394	0.956522	0.32	0.3809
RP11.445H22.3	0.1	4	0.704225	0.978261	0.2	0.5609
AC005224.2	10	2	0.71831	0.956522	0.28	0.5704
RP11.417J1.4	1	1	0.746479	0.934783	0.4	0.627
RP11.642D21.1	1e-05	1	0.647887	1	0	0.48
RP11.445H22.4	1	2	0.71831	0.978261	0.24	0.3965
LOC148413	10	2	0.732394	0.869565	0.48	0.4809
AC092620.2	1e-05	1	0.647887	1	0	0.493
AC120114.3	10000	2	0.647887	1	0	0.673
LOC100129361	0.1	1	0.732394	0.913043	0.4	0.48
HAR1A	10	4	0.788732	0.891304	0.6	0.5757
AC005041.9	10	2	0.802817	0.913043	0.6	0.5417
LOC375196	0.1	1	0.746479	0.934783	0.4	0.4487
NCRNA00294	0.1	1	0.746479	0.934783	0.4	0.5583
LOC100272216	10000	1	0.647887	1	0	0.3904
RFPL1.AS1	100	1	0.647887	1	0	0.4835
RP11.65D13.1	1	1	0.732394	0.978261	0.28	0.4609
FLJ45340	10	1	0.746479	0.891304	0.48	0.527
LOC642826	100	1	0.830986	0.913043	0.68	0.4983
AC066593.1	100	1	0.647887	1	0	0.5948
RP11.521D12.1	1	1	0.732394	0.956522	0.32	0.5878
NCRNA00107	1000	1	0.788732	0.978261	0.44	0.6443
C17orf91	10	2	0.647887	1	0	0.5183
RP11.974F13.6	10	4	0.647887	1	0	0.4548
RP11.393B14.1	1	1	0.704225	0.934783	0.28	0.4322
RP11.147I3.1	1	1	0.647887	1	0	0.4443
AL132709.9	1e-05	1	0.647887	1	0	0.5504
NCRNA00324	1e-05	1	0.647887	1	0	0.56
LOC153684	1000	1	0.859155	1	0.6	0.6409
AL360001.1	100	2	0.788732	0.956522	0.48	0.6296
AL162831.1	10	1	0.802817	0.913043	0.6	0.5104
SMCR5	1e-05	1	0.647887	1	0	0.48
AL157931.2	0.1	2	0.647887	1	0	0.4548
COPG2IT1	100	2	0.830986	0.978261	0.56	0.6165
AC009133.2	1e-05	1	0.676056	0.978261	0.12	0.4852
RP11.178A10.1	100000	1	0.0140845	0.0217391	0	0.3604
CTC.547D20.1	1e-05	1	0.647887	1	0	0.4504
LOC100128822	1	2	0.71831	0.847826	0.48	0.3661
AC093323.3	100	1	0.802817	0.978261	0.48	0.6826
C21orf71	100	1	0.647887	1	0	0.5748
FTX	1	4	0.746479	0.913043	0.44	0.5148
RP11.10O22.2	1000	2	0.887324	0.978261	0.72	0.6504
RP11.163O17.1	10	1	0.732394	0.956522	0.32	0.5287
RP11.420A23.1	10	1	0.704225	0.913043	0.32	0.513
RP11.29H23.1	1	1	0.746479	0.913043	0.44	0.6191
NCRNA00205	1e-05	1	0.647887	0.913043	0.16	0.4243

## Sheet: Black_kegg
ID	Description	GeneRatio	BgRatio	pvalue	p.adjust	qvalue	geneID	Count
hsa05030	Cocaine addiction	5/62	49/7493	4.74641e-05	0.0054503	0.00459961	SLC6A3/SLC18A1/TH/DDC/SLC18A2	5
hsa04728	Dopaminergic synapse	7/62	131/7493	9.39706e-05	0.0054503	0.00459961	SLC6A3/SLC18A1/TH/KCNJ6/DDC/ITPR1/SLC18A2	7
hsa05031	Amphetamine addiction	5/62	68/7493	0.00023003	0.00889448	0.00750623	SLC6A3/SLC18A1/TH/DDC/SLC18A2	5
hsa04726	Serotonergic synapse	6/62	115/7493	0.000350109	0.0101532	0.00856847	SLC18A1/KCNJ6/DDC/ITPR1/SLC18A2/GABRB1	6
hsa04360	Axon guidance	6/62	181/7493	0.00366311	0.07312	0.0617074	NTN4/UNC5B/SLIT1/TRPC6/ROBO2/NTN1	6
hsa04721	Synaptic vesicle cycle	4/62	78/7493	0.00383825	0.07312	0.0617074	SLC6A3/SLC18A1/UNC13C/SLC18A2	4
hsa04020	Calcium signaling pathway	6/62	188/7493	0.00441241	0.07312	0.0617074	NTSR1/PLCD4/AGTR1/CACNA1E/ITPR1/CAMK1G	6
hsa05012	Parkinson disease	5/62	142/7493	0.00619897	0.0898851	0.0758559	SLC6A3/SLC18A1/TH/SLC18A2/SNCA	5
hsa04080	Neuroactive ligand-receptor interaction	7/62	277/7493	0.00755578	0.0928602	0.0783666	NTSR1/AGTR1/GLRA3/SSTR1/GABRB1/GABRA4/CHRNB3	7
hsa04925	Aldosterone synthesis and secretion	4/62	96/7493	0.00800519	0.0928602	0.0783666	AGTR1/ITPR1/NR4A2/CAMK1G	4
hsa04927	Cortisol synthesis and secretion	3/62	64/7493	0.0157145	0.156903	0.132414	AGTR1/ITPR1/PBX1	3
hsa05034	Alcoholism	5/62	180/7493	0.0162313	0.156903	0.132414	SLC6A3/SLC18A1/TH/DDC/SLC18A2	5
hsa00830	Retinol metabolism	3/62	67/7493	0.0177562	0.15844	0.13371	CYP27C1/ALDH1A1/RDH12	3
hsa00790	Folate biosynthesis	2/62	26/7493	0.0192716	0.159679	0.134756	GCH1/TH	2
hsa04742	Taste transduction	3/62	83/7493	0.031042	0.214962	0.18141	SCN3A/GABRA4/SCN9A	3
hsa04723	Retrograde endocannabinoid signaling	4/62	148/7493	0.033702	0.214962	0.18141	KCNJ6/ITPR1/GABRB1/GABRA4	4
hsa00350	Tyrosine metabolism	2/62	36/7493	0.0354415	0.214962	0.18141	TH/DDC	2
hsa00500	Starch and sucrose metabolism	2/62	36/7493	0.0354415	0.214962	0.18141	GBE1/PGM2L1	2
hsa04921	Oxytocin signaling pathway	4/62	152/7493	0.0366394	0.214962	0.18141	KCNJ6/ITPR1/CACNB3/CAMK1G	4
hsa04727	GABAergic synapse	3/62	89/7493	0.0370623	0.214962	0.18141	KCNJ6/GABRB1/GABRA4	3
hsa05032	Morphine addiction	3/62	91/7493	0.0391932	0.216496	0.182705	KCNJ6/GABRB1/GABRA4	3
hsa05033	Nicotine addiction	2/62	40/7493	0.0429694	0.226566	0.191204	GABRB1/GABRA4	2
hsa04070	Phosphatidylinositol signaling system	3/62	99/7493	0.0483273	0.243738	0.205695	PLCD4/PIP5K1B/ITPR1	3

## Sheet: blue_kegg
ID	Description	GeneRatio	BgRatio	pvalue	p.adjust	qvalue	geneID	Count
hsa05016	Huntington disease	46/469	193/7493	7.71388e-16	2.19846e-13	2.06245e-13	GPX1/CYC1/SDHA/COX8A/COX6B1/UQCRQ/NDUFS3/COX6C/UQCRC1/NDUFS2/NDUFA1/NDUFS6/CLTCL1/NDUFA9/ATP5G1/CREB3/DCTN1/POLR2I/NDUFB11/NDUFA3/NDUFA13/NDUFB9/COX4I1/VDAC1/AP2S1/SLC25A4/SLC25A6/ATP5D/AP2A2/CLTC/CLTB/UQCR10/COX7C/COX5B/GRIN1/NDUFB10/NDUFA11/DNAH11/POLR2E/POLR2L/NDUFB8/NDUFB7/NDUFB2/NDUFA7/EP300/NDUFV3	46
hsa05012	Parkinson disease	38/469	142/7493	5.10343e-15	7.27238e-13	6.82248e-13	UBB/CYC1/SDHA/COX8A/COX6B1/UQCRQ/NDUFS3/COX6C/UQCRC1/NDUFS2/NDUFA1/NDUFS6/NDUFA9/ATP5G1/NDUFB11/NDUFA3/NDUFA13/NDUFB9/PRKACA/HTRA2/COX4I1/UBE2L3/VDAC1/SLC25A4/SLC25A6/ATP5D/UQCR10/COX7C/COX5B/NDUFB10/DRD2/NDUFA11/PINK1/NDUFB8/NDUFB7/NDUFB2/NDUFA7/NDUFV3	38
hsa00190	Oxidative phosphorylation	34/469	133/7493	6.26679e-13	5.95345e-11	5.58514e-11	ATP6V0B/CYC1/SDHA/COX8A/COX6B1/UQCRQ/NDUFS3/COX6C/UQCRC1/NDUFS2/NDUFA1/NDUFS6/NDUFA9/ATP5G1/ATP6V0E2/NDUFB11/NDUFA3/NDUFA13/NDUFB9/COX4I1/ATP6V0C/ATP6V1H/ATP5I/ATP5D/UQCR10/COX7C/COX5B/NDUFB10/NDUFA11/NDUFB8/NDUFB7/NDUFB2/NDUFA7/NDUFV3	34
hsa05010	Alzheimer disease	35/469	171/7493	2.54553e-10	1.81369e-08	1.70149e-08	CYC1/SDHA/COX8A/COX6B1/UQCRQ/NDUFS3/COX6C/UQCRC1/NDUFS2/HSD17B10/NDUFA1/APBB1/NDUFS6/NDUFA9/ATP5G1/NDUFB11/NDUFA3/NDUFA13/NDUFB9/GAPDH/COX4I1/ATP5D/PSEN2/GSK3B/UQCR10/COX7C/COX5B/GRIN1/NDUFB10/NDUFA11/NDUFB8/NDUFB7/NDUFB2/NDUFA7/NDUFV3	35
hsa04714	Thermogenesis	41/469	231/7493	7.28947e-10	4.155e-08	3.89795e-08	CYC1/SDHA/COX8A/COX6B1/UQCRQ/NDUFS3/COX6C/UQCRC1/NDUFS2/NDUFA1/NDUFS6/NDUFA9/ATP5G1/NDUFAF3/CREB3/HRAS/NDUFB11/NDUFA3/MLST8/NDUFA13/NDUFB9/COX14/CPT1C/PRKACA/ACTL6B/COX4I1/KRAS/ATP5I/ATP5D/UQCR10/COX7C/COX5B/NDUFB10/COA7/NDUFA11/SMARCA4/NDUFB8/NDUFB7/NDUFB2/NDUFA7/NDUFV3	41
hsa04932	Non-alcoholic fatty liver disease (NAFLD)	29/469	149/7493	3.02398e-08	1.43639e-06	1.34753e-06	CYC1/SDHA/COX8A/COX6B1/UQCRQ/NDUFS3/COX6C/UQCRC1/NDUFS2/NDUFA1/NDUFS6/ADIPOQ/NDUFA9/NDUFB11/NDUFA3/NDUFA13/NDUFB9/COX4I1/GSK3B/UQCR10/COX7C/COX5B/NDUFB10/NDUFA11/NDUFB8/NDUFB7/NDUFB2/NDUFA7/NDUFV3	29
hsa03050	Proteasome	13/469	45/7493	2.20073e-06	8.96013e-05	8.40581e-05	PSMD8/PSMD2/PSMC3/ADRM1/PSMD3/PSMB3/PSMB10/PSMC1/PSMB5/PSMB6/PSMC5/PSMD13/PSMD4	13
hsa04723	Retrograde endocannabinoid signaling	24/469	148/7493	1.36829e-05	0.000487454	0.000457297	GNB2/NDUFS3/NDUFS2/NDUFA1/NDUFS6/FAAH/NDUFA9/DAGLA/NDUFB11/NDUFA3/NDUFA13/NDUFB9/PRKACA/KCNJ9/CACNA1B/GRIA3/NDUFB10/NDUFA11/GNG7/NDUFB8/NDUFB7/NDUFB2/NDUFA7/NDUFV3	24
hsa04721	Synaptic vesicle cycle	16/469	78/7493	1.99155e-05	0.000630658	0.000591643	ATP6V0B/RAB3A/CLTCL1/ATP6V0E2/DNM1/STX1B/ATP6V0C/ATP6V1H/CACNA1B/VAMP2/AP2S1/AP2A2/UNC13A/CLTC/CLTB/CPLX2	16
hsa01200	Carbon metabolism	19/469	116/7493	9.36717e-05	0.00266964	0.00250448	HK1/SDHA/ECHS1/ALDOC/GPI/GOT1/DLST/OGDHL/SDSL/SHMT2/GAPDH/ALDOA/PDHA1/TPI1/ME3/PGP/IDH3B/PKM/IDH3G	19
hsa04144	Endocytosis	31/469	244/7493	0.000115813	0.00300062	0.00281499	GRK7/UBB/GBF1/ARF5/CHMP1A/CHMP2A/PRKCZ/PARD6A/CLTCL1/RAB11FIP5/CHMP7/PIP5K1C/HRAS/DNM1/VPS4A/SNF8/VPS28/EPN3/ARPC5L/AP2S1/SH3GLB2/AP2A2/KIF5A/CLTC/CLTB/WIPF3/ARPC4/EHD3/AGAP2/AGAP3/SMURF1	31
hsa04142	Lysosome	16/469	123/7493	0.00404844	0.0961505	0.0902021	ATP6V0B/CTSA/CD63/CTSD/CTSF/PLA2G15/AP1B1/CLTCL1/GLA/SUMF1/ATP6V0C/ATP6V1H/AP1S1/IDS/CLTC/CLTB	16
hsa04130	SNARE interactions in vesicular transport	7/469	34/7493	0.00441246	0.0967347	0.0907502	STX18/STX1B/VAMP1/VAMP2/YKT6/USE1/SNAP23	7
hsa01230	Biosynthesis of amino acids	11/469	75/7493	0.00657791	0.116607	0.109393	ALDOC/ASL/GOT1/SDSL/SHMT2/GAPDH/ALDOA/TPI1/IDH3B/PKM/IDH3G	11
hsa05130	Pathogenic Escherichia coli infection	9/469	55/7493	0.00658326	0.116607	0.109393	TUBA1A/TUBA4A/TUBA1C/TUBA1B/ARPC5L/TUBB3/ARPC4/TUBB4B/TUBB	9
hsa00532	Glycosaminoglycan biosynthesis - chondroitin sulfate / dermatan sulfate	5/469	20/7493	0.00664821	0.116607	0.109393	CHPF/CHPF2/B3GALT6/B4GALT7/B3GAT3	5
hsa03010	Ribosome	18/469	153/7493	0.00695551	0.116607	0.109393	FAU/RPS5/RPL8/MRPL28/MRPS7/MRPL24/RPL36/MRPL34/UBA52/MRPL17/MRPL27/MRPL10/MRPL14/MRPS9/MRPS15/MRPL2/RPS9/MRPS18A	18
hsa04728	Dopaminergic synapse	16/469	131/7493	0.00747735	0.118391	0.111067	PPP2R1A/GNB2/CREB3/CALY/PRKACA/KCNJ9/CACNA1B/PPP2R5B/PPP2R5D/KIF5A/GSK3B/GRIA3/DRD2/GNG7/CAMK2B/CAMK2G	16
hsa04540	Gap junction	12/469	88/7493	0.00832805	0.123624	0.115976	TUBA1A/TUBA4A/HRAS/PRKACA/MAP2K2/TUBA1C/TUBA1B/KRAS/TUBB3/DRD2/TUBB4B/TUBB	12
hsa04260	Cardiac muscle contraction	11/469	78/7493	0.00882837	0.123624	0.115976	CYC1/COX8A/COX6B1/UQCRQ/COX6C/UQCRC1/COX4I1/UQCR10/COX7C/COX5B/CACNG2	11
hsa03040	Spliceosome	16/469	134/7493	0.00924809	0.123624	0.115976	PRPF8/SNRPC/SNRPD3/PRPF19/SF3A3/PPIH/LSM7/LSM2/PUF60/CTNNBL1/SF3B5/CCDC12/U2AF1L4/TCERG1/LSM4/PQBP1	16
hsa00020	Citrate cycle (TCA cycle)	6/469	30/7493	0.00954291	0.123624	0.115976	SDHA/DLST/OGDHL/PDHA1/IDH3B/IDH3G	6
hsa04136	Autophagy - other	6/469	32/7493	0.0131043	0.162379	0.152334	GABARAP/ATG2A/ATG101/MLST8/ATG4D/GABARAPL1	6
hsa00051	Fructose and mannose metabolism	6/469	33/7493	0.0151944	0.180433	0.169271	HK1/ALDOC/PMM1/ALDOA/TPI1/GMDS	6
hsa04137	Mitophagy - animal	9/469	65/7493	0.019088	0.217603	0.204141	UBB/GABARAP/ULK1/HRAS/FIS1/CALCOCO2/KRAS/GABARAPL1/PINK1	9
hsa00480	Glutathione metabolism	8/469	56/7493	0.0222361	0.243149	0.228106	GPX1/GPX4/SRM/GSTK1/CHAC1/GSS/GGT7/MGST3	8
hsa04930	Type II diabetes mellitus	7/469	46/7493	0.0230352	0.243149	0.228106	HK1/PRKCZ/PRKCD/ADIPOQ/CACNA1B/CACNA1G/PKM	7
hsa04961	Endocrine and other factor-regulated calcium reabsorption	7/469	47/7493	0.0256611	0.261194	0.245035	CLTCL1/DNM1/PRKACA/AP2S1/AP2A2/CLTC/CLTB	7
hsa00620	Pyruvate metabolism	6/469	39/7493	0.0326835	0.3212	0.301329	HAGH/LDHD/PDHA1/GRHPR/ME3/PKM	6
hsa05100	Bacterial invasion of epithelial cells	9/469	74/7493	0.0403897	0.383702	0.359964	CLTCL1/DNM1/SEPT3/SHC3/ARPC5L/CLTC/CLTB/ARPC4/SEPT8	9
hsa04210	Apoptosis	14/469	136/7493	0.0446904	0.410863	0.385445	CTSD/CTSF/ENDOG/AIFM1/TUBA1A/TUBA4A/HRAS/HTRA2/MAP2K2/TUBA1C/TUBA1B/KRAS/DFFA/PTPN13	14
